# Supplementary material for: Impact of Central Obesity on Bone Mineral Density Across Life Stages: A Genetic Epidemiology and Cross-Sectional Study
Source: Research Square preprint supplement (doi:10.21203/rs.3.rs-5872489/v1), 2025-01-23
Supplement: Supplementary file 1 [file 730ae66bccb956181df5af69.docx]

**Supplementary File 3**

**Table S1** Association between ABSI and total body less head bone mineral density (TB-BMD).

| **Exposure** | **Model 1a**  **β（95% CI）** | ***p*-value** | **Model 2b**  **β（95% CI）** | ***p*-value** | **Model 3c**  **β（95% CI）** | ***p*-value** |
| --- | --- | --- | --- | --- | --- | --- |
| **ABSI (continuous)** | **-4.345**  **(-4.897, -3.792)** | **<0.0001** | **-3.923**  **(-4.425, -3.421)** | **<0.0001** | **-3.531**  **(-4.146, -2.915)** | **<0.0001** |
| ABSI (quartile) |  |  |  |  |  |  |
| Low | Ref |  | Ref |  | Ref |  |
| Medium | -0.018  (-0.023, -0.012) | <0.0001 | -0.017  (-0.022, -0.012) | <0.0001 | -0.017  (-0.023, -0.011) | <0.0001 |
| High | -0.038  (-0.044, -0.033) | <0.0001 | -0.035  (-0.040, -0.030) | <0.0001 | -0.032  (-0.038, -0.026) | <0.0001 |
| ***p* for trend** |  | **<0.0001** |  | **<0.0001** |  | **<0.0001** |

aModel 1: unadjusted.

bModel 2: adjusted for gender, age, and race.

cModel 3: Adjusted for gender, age, race, FIPR, education level, smoking, drinking, moderate activity, diabetes, ALP, ALT, AST, creatinine, total cholesterol, HDL-C, albumin, phosphorus, calcium and 25(OH)D.

**Table S2** Association between ABSI and pelvis bone mineral density (PE-BMD)

| **Exposure** | **Model 1a**  **β（95% CI）** | ***p*-value** | **Model 2b**  **β（95% CI）** | ***p*-value** | **Model 3c**  **β（95% CI）** | ***p*-value** |
| --- | --- | --- | --- | --- | --- | --- |
| **ABSI (continuous)** | **-3.622**  **(-4.897, -3.792)** | **<0.0001** | **-1.959**  **(-2.855, -1.063)** | **<0.0001** | **-1.949**  **(-3.042, -0.855)** | **0.0005** |
| ABSI (quartile) |  |  |  |  |  |  |
| Low | Ref |  | Ref |  | Ref |  |
| Medium | -0.008  (-0.017, 0.000) | 0.0630 | 0.000  (-0.008, 0.009) | 0.9280 | -0.002  (-0.013, 0.008) | 0.6455 |
| High | -0.030  (-0.039, -0.021) | <0.0001 | -0.014  (-0.023, -0.005) | 0.0034 | -0.015  (-0.026, -0.004) | 0.0090 |
| ***p* for trend** |  | **<0.0001** |  | **0.0032** |  | **0.0091** |

aModel 1: unadjusted.

bModel 2: adjusted for gender, age, and race.

cModel 3: Adjusted for gender, age, race, FIPR, education level, smoking, drinking, moderate activity, diabetes, ALP, ALT, AST, creatinine, total cholesterol, HDL-C, albumin, phosphorus, calcium and 25(OH)D.

**Table S3** Association between ABSI and lumbar spine bone mineral density(LS-BMD).

| **Exposure** | **Model 1a**  **β（95% CI）** | ***p*-value** | **Model 2b**  **β（95% CI）** | ***p*-value** | **Model 3c**  **β（95% CI）** | ***p*-value** |
| --- | --- | --- | --- | --- | --- | --- |
| **ABSI (continuous)** | **-8.836**  **(-9.594, -8.077)** | **<0.0001** | **-7.573**  **(-8.387, -6.759)** | **<0.0001** | **-6.364**  **(-7.365, -5.363)** | **<0.0001** |
| ABSI (quartile) |  |  |  |  |  |  |
| Low | Ref |  | Ref |  | Ref |  |
| Medium | -0.044  (-0.052, -0.036) | <0.0001 | -0.034  (-0.042, -0.026) | <0.0001 | -0.027  (-0.037, -0.018) | <0.0001 |
| High | -0.080  (-0.088, -0.072) | <0.0001 | -0.066  (-0.074, -0.057) | <0.0001 | -0.055  (-0.066, -0.045) | <0.0001 |
| ***p* for trend** |  | **<0.0001** |  | **<0.0001** |  | **<0.0001** |

aModel 1: unadjusted.

bModel 2: adjusted for gender, age, and race.

cModel 3: Adjusted for gender, age, race, FIPR, education level, smoking, drinking, moderate activity, diabetes, ALP, ALT, AST, creatinine, total cholesterol, HDL-C, albumin, phosphorus, calcium and 25(OH)D.

**Table S4** Threshold analysis of ABSI on TB-BMD across three age groups via two-stage linear regression

| **TB-BMD** | **20-30 years** | **30-45 years** | **45-60 years** |
| --- | --- | --- | --- |
| **β (95% CI), *p*-value** | **β (95% CI), *p*-value** | **β (95% CI), *p*-value** |
| **ABSI** | | | |
| Inflection point (K) | 0.076 | 0.086 | 0.076 |
| <K point effect 1 | -6.958 (-10.015, -3.901) <0.0001 | -4.782 (-5.844, -3.720) <0.0001 | 1.163 (-4.139, 6.464)  0.6674 |
| >K point effect 2 | -3.516 (-5.029, -2.004) <0.0001 | 3.882 (-2.345, 10.108) 0.2219 | -3.630 (-4.922, -2.338) <0.0001 |
| Log likelihood ratio | 0.079 | 0.685 | 0.102 |

The model adjusted for covariates such as gender, age, race, FIPR, education level, smoking, drinking, moderate activity, diabetes, ALP, ALT, AST, creatinine, total cholesterol, HDL-C, albumin, phosphorus, calcium and 25(OH)D.

**Table S5** Threshold analysis of ABSI on PE-BMD across three age groups via two-stage linear regression

| **PE-BMD** | **20-30 years** | **30-45 years** | **45-60 years** |
| --- | --- | --- | --- |
| **β (95% CI), *p*-value** | **β (95% CI), *p*-value** | **β (95% CI), *p*-value** |
| **ABSI** | | | |
| Inflection point (K) | 0.076 | 0.086 | 0.076 |
| <K point effect 1 | -7.375 (-12.865, -1.884) 0.0086 | -2.540 (-4.467, -0.614) 0.0098 | 9.202 (0.185, 18.219)  0.0457 |
| >K point effect 2 | -3.021 (-5.738, -0.304) 0.0294 | 2.952 (-8.343, 14.246) 0.6086 | -3.221 (-5.419, -1.023) 0.0041 |
| Log likelihood ratio | 0.216 | 0.368 | 0.013 |

The model adjusted for covariates such as gender, age, race, FIPR, education level, smoking, drinking, moderate activity, diabetes, ALP, ALT, AST, creatinine, total cholesterol, HDL-C, albumin, phosphorus, calcium and 25(OH)D.

**Table S6** Threshold analysis of ABSI on LS-BMD across three age groups via two-stage linear regression

| **LS-BMD** | **20-30 years** | **30-45 years** | **45-60 years** |
| --- | --- | --- | --- |
| **β (95% CI), *p*-value** | **β (95% CI), *p*-value** | **β (95% CI), *p*-value** |
| **ABSI** | | | |
| Inflection point (K) | 0.076 | 0.076 | 0.076 |
| <K point effect 1 | -13.228 (-17.874, -8.581) <0.0001 | -9.139 (-14.888, -3.390) 0.0019 | 4.042 (-5.258, 13.341) 0.3945 |
| >K point effect 2 | -5.818 (-8.117, -3.520) <0.0001 | -5.855 (-7.731, -3.979) <0.0001 | -6.587 (-8.854, -4.320) <0.0001 |
| Log likelihood ratio | 0.013 | 0.329 | 0.039 |

The model adjusted for covariates such as gender, age, race, FIPR, education level, smoking, drinking, moderate activity, diabetes, ALP, ALT, AST, creatinine, total cholesterol, HDL-C, albumin, phosphorus, calcium and 25(OH)D.
