# Supplementary material for: Impact of Central Obesity on Bone Mineral Density Across Life Stages: A Genetic Epidemiology and Cross-Sectional Study
Source: Research Square preprint supplement (doi:10.21203/rs.3.rs-5872489/v1), 2025-01-23
Supplement: Supplementary file 1 [file 7673a9d9c20a0086b653117f.pdf]

## Supplementary File 2

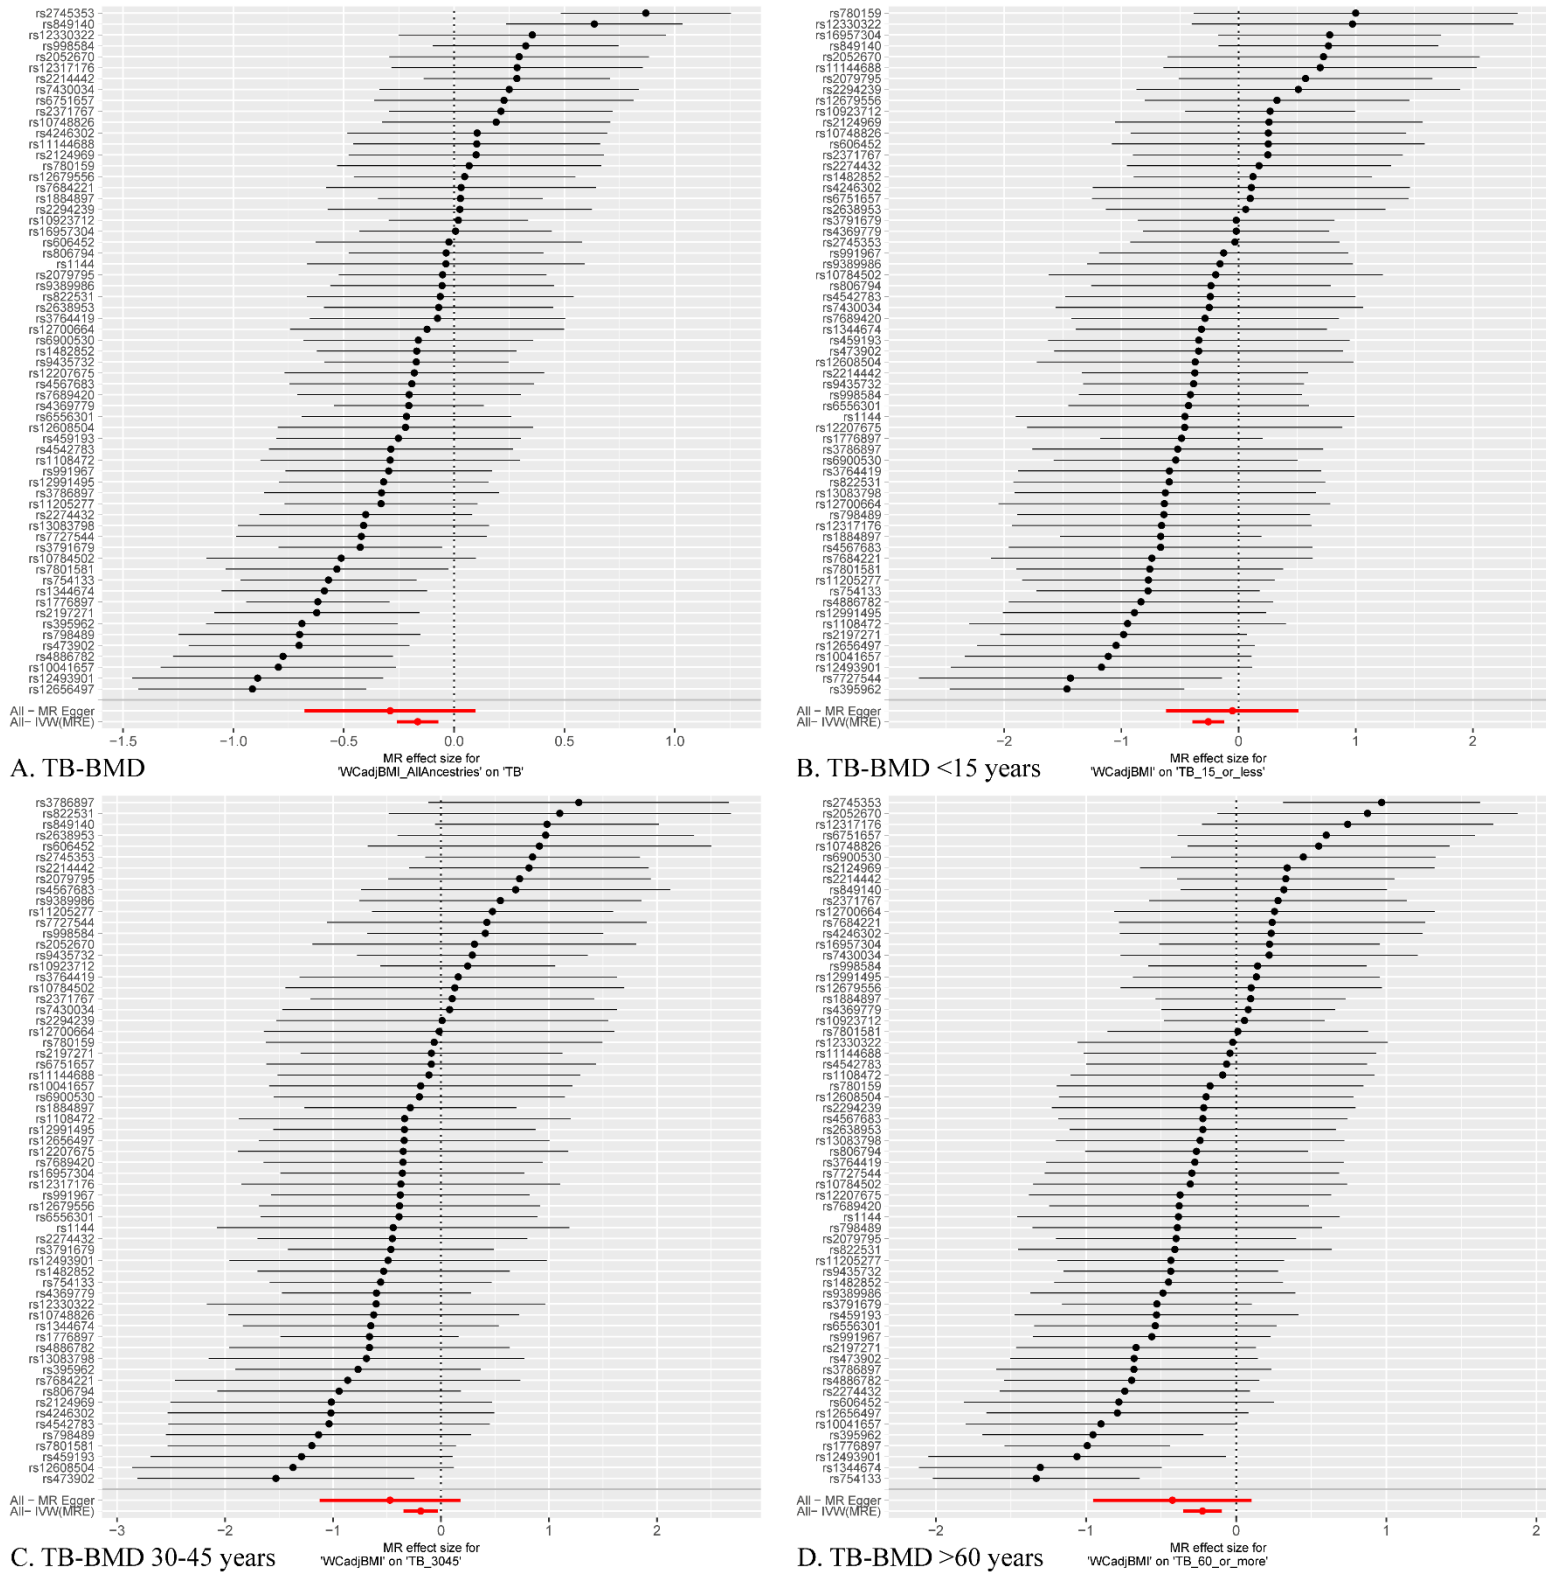

Figure S1. Forest plot of SNPs associated with WCadjBMI and TB-BMD

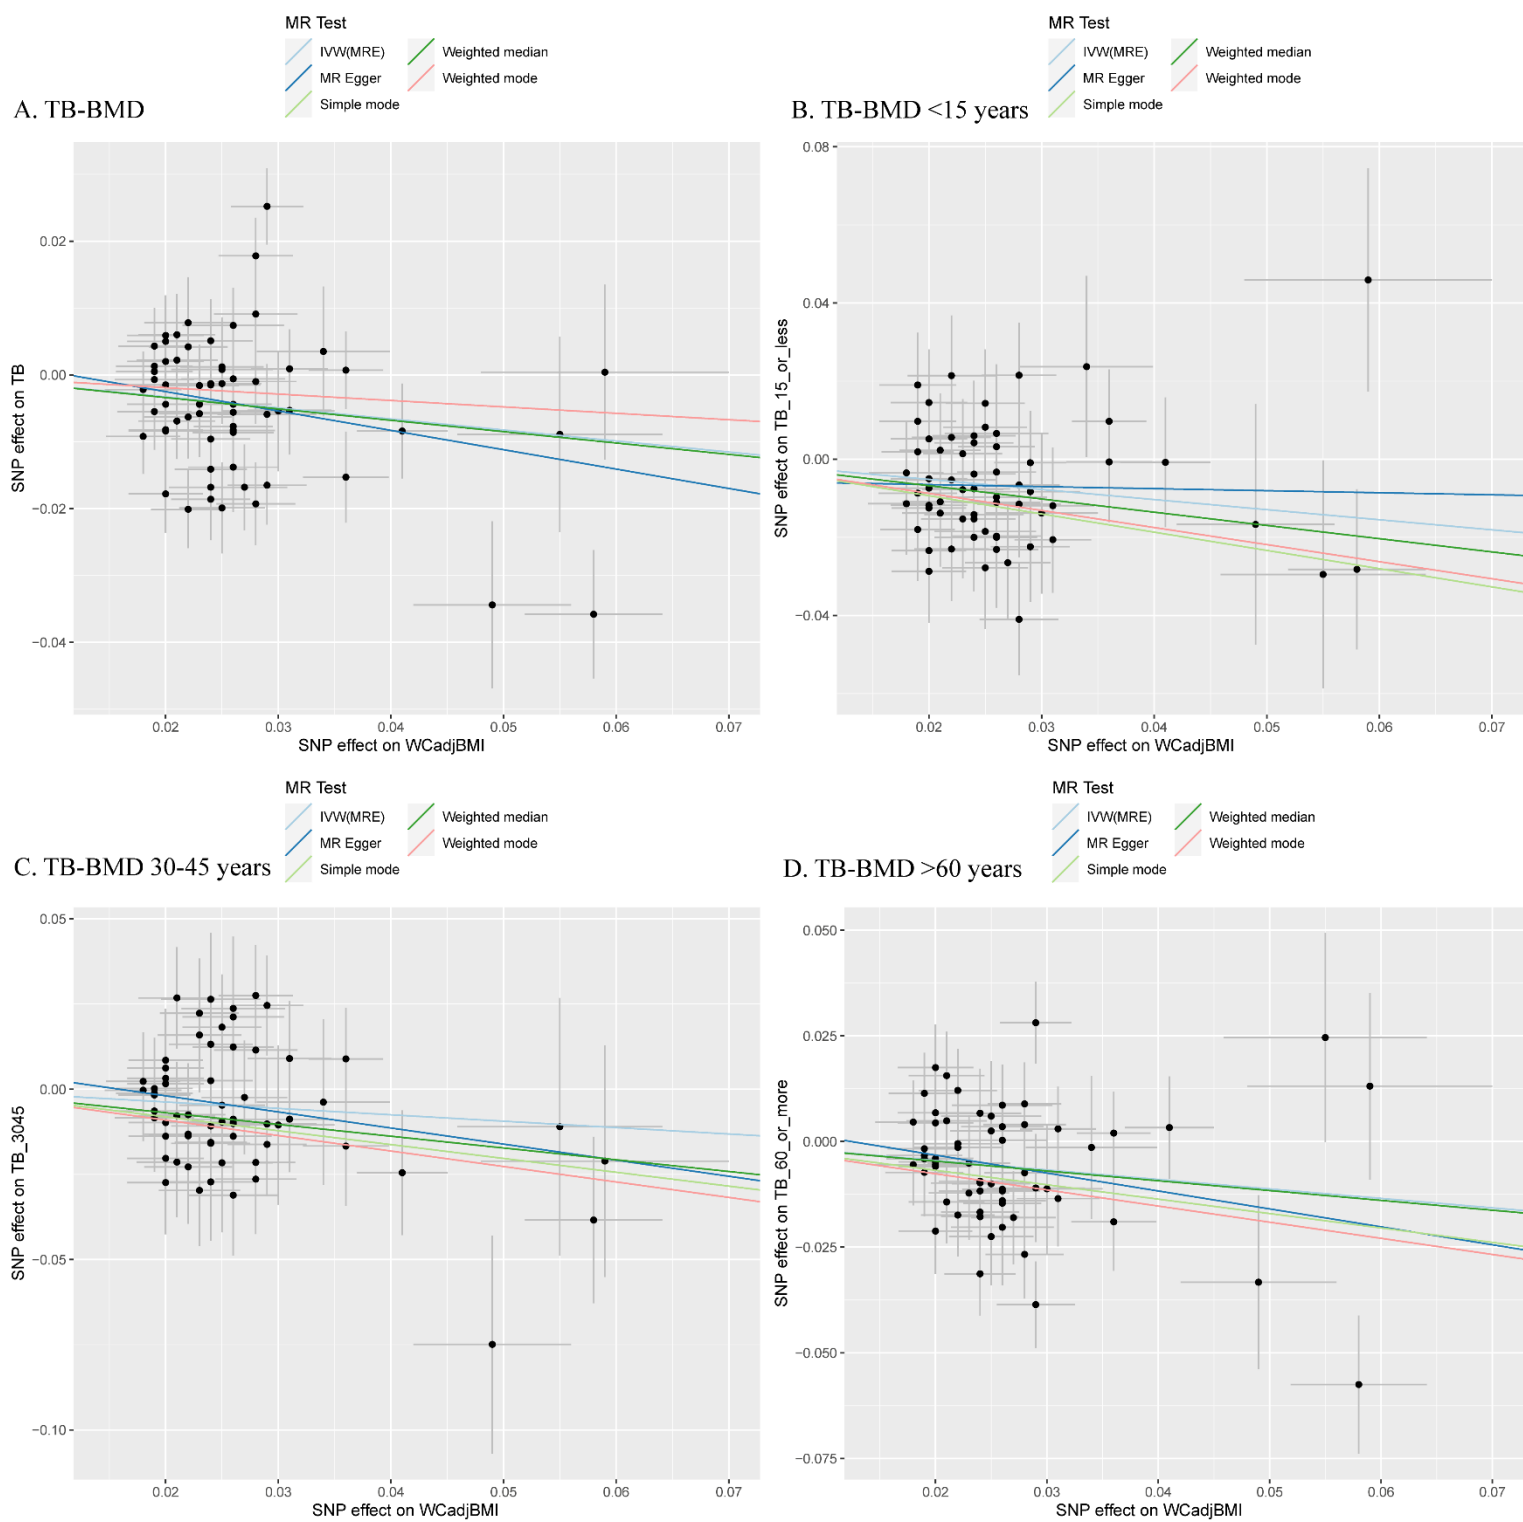

**Figure S2. Scatter plot of SNPs associated with WCadjBMI and TB-BMD**

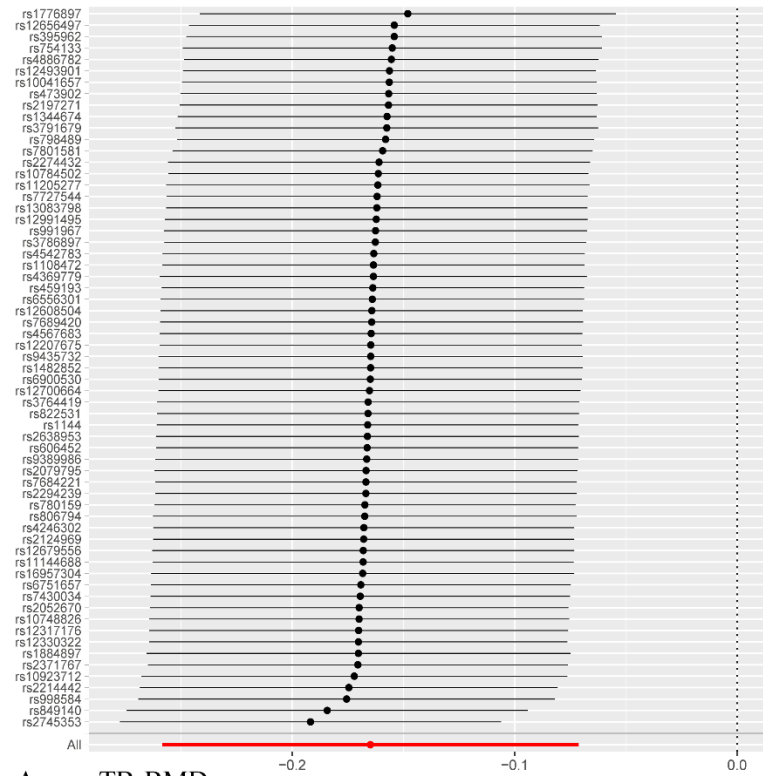

A. TB-BMD

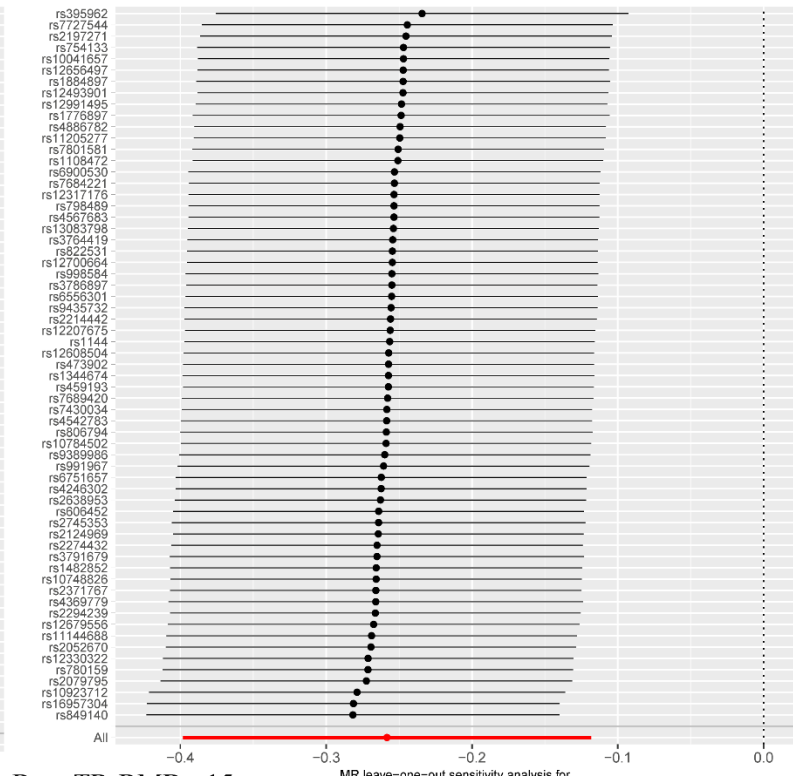

B. TB-BMD <15 years

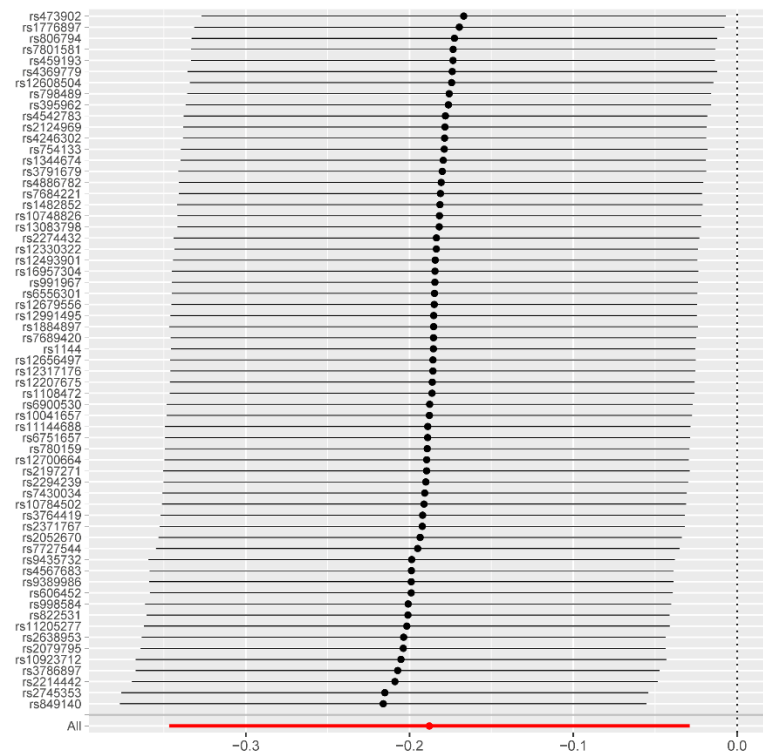

C. TB-BMD 30-45 years

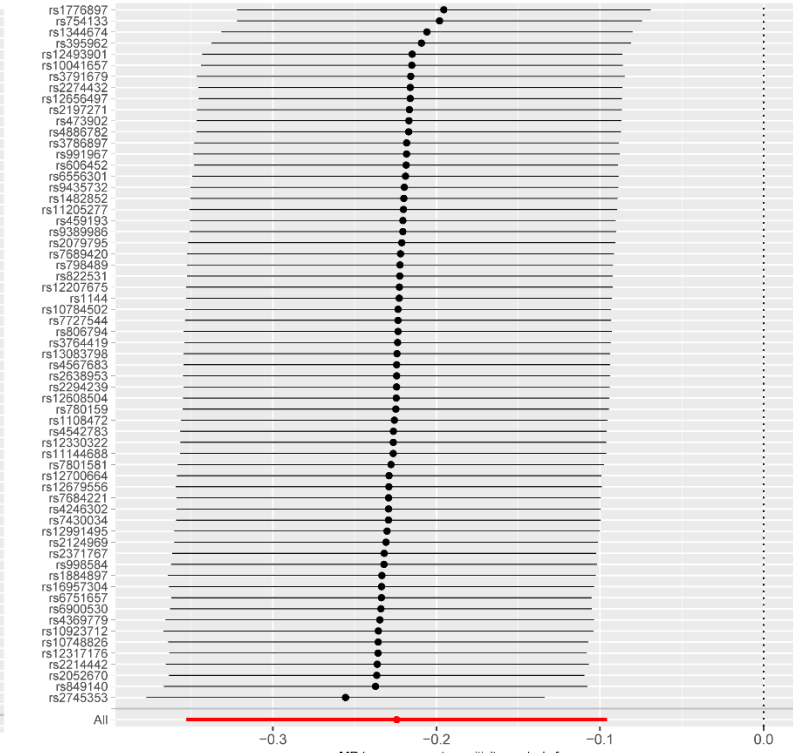

D. TB-BMD >60 years

**Figure S3. Leave-one-out analysis of SNPs associated with WCadjBMI and TB-BMD**

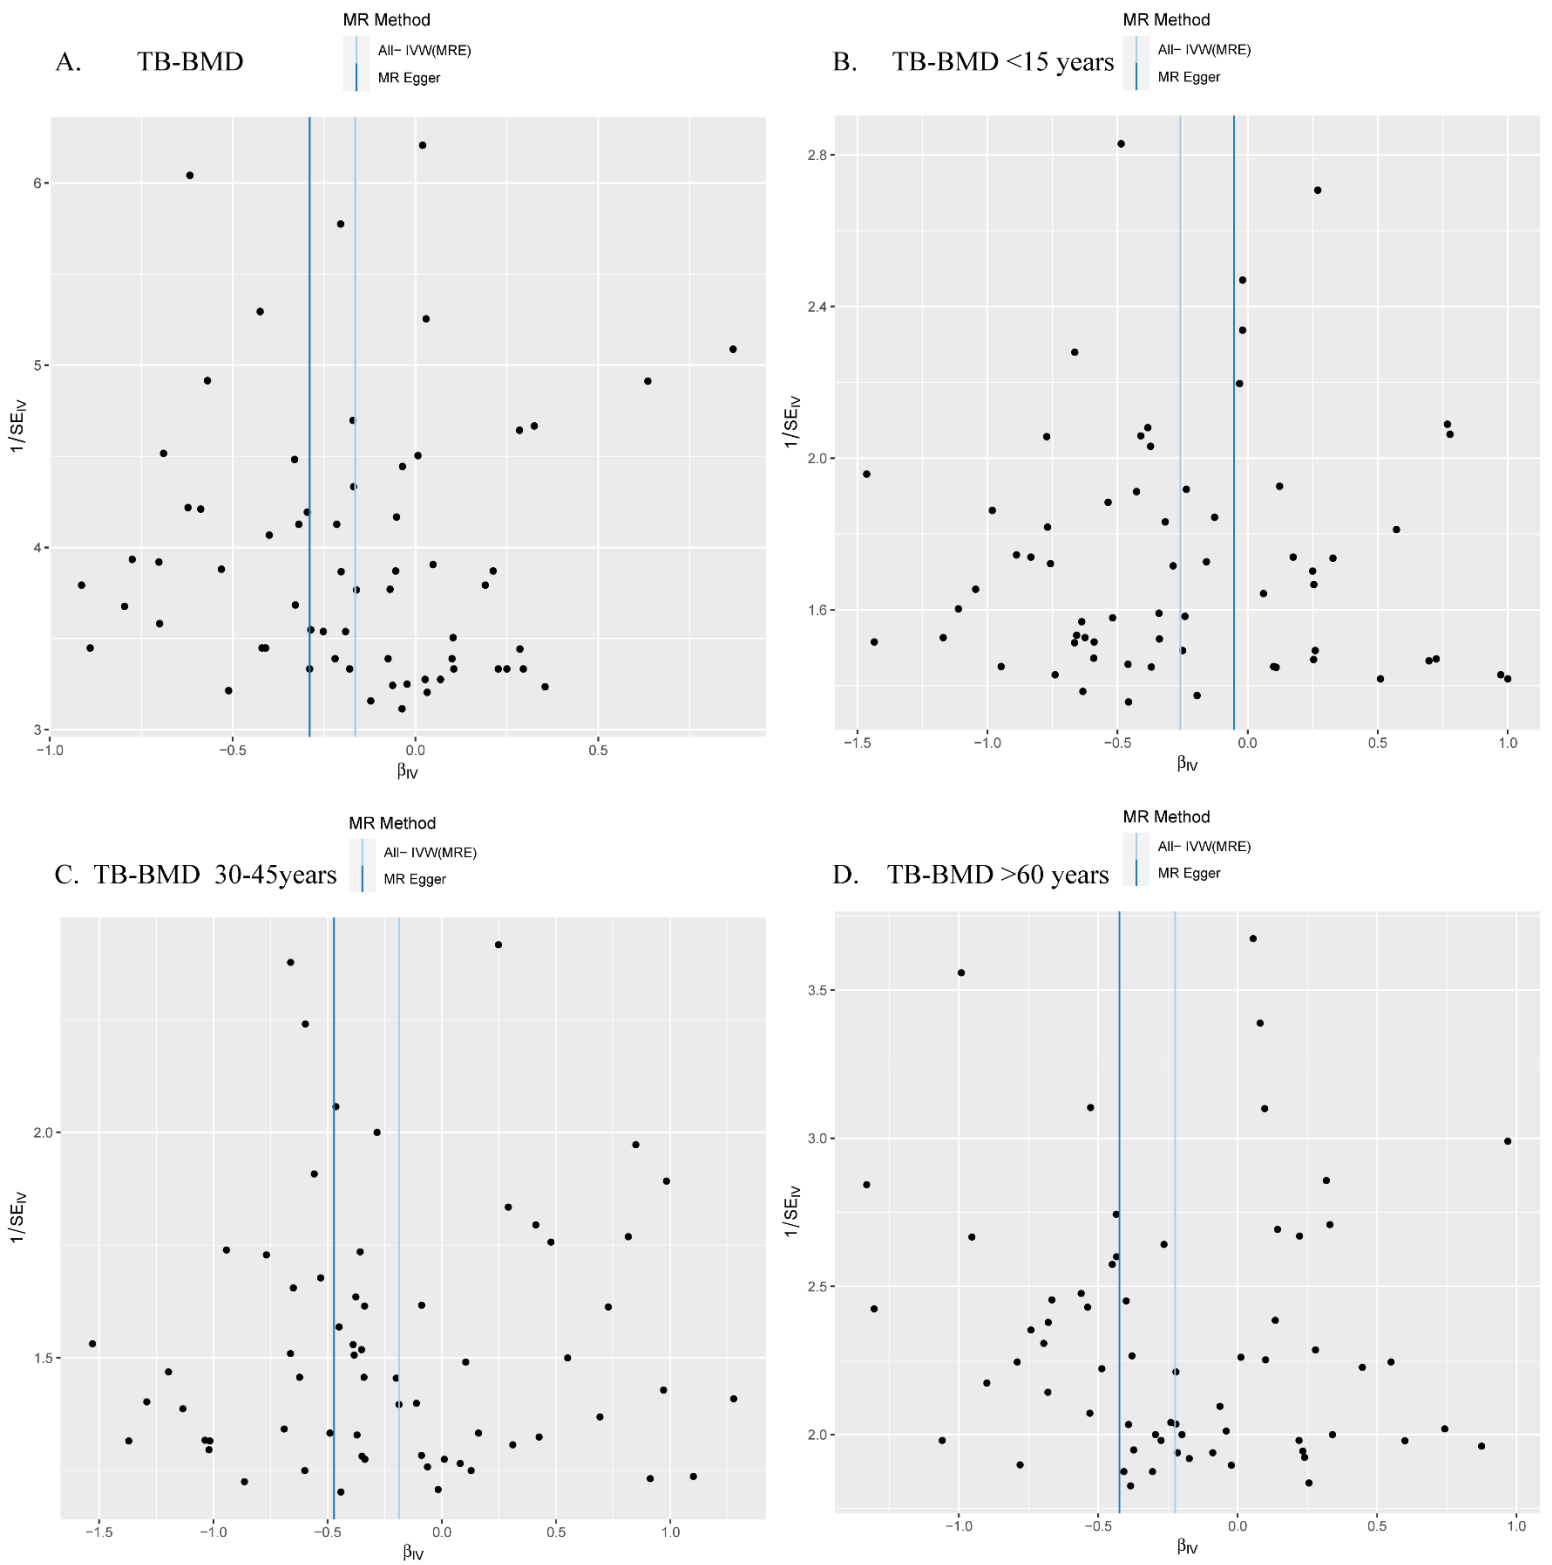

**Figure S4. Funnel plot of SNPs associated with WCadjBMI and TB-BMD**
