# Supplementary material for: Impact of Central Obesity on Bone Mineral Density Across Life Stages: A Genetic Epidemiology and Cross-Sectional Study
Source: Research Square preprint supplement (doi:10.21203/rs.3.rs-5872489/v1), 2025-01-23
Supplement: Supplementary file 2 [file cb0b932847f1100ad0d05fa7.xlsx]

## Sheet: Supplementary Tables
Impact of Central Obesity on Bone Mineral Density Across Life Stages: A Genetic Epidemiology and Cross-Sectional Study
Supplementary File 1
Contents:
Supplementary Table S1. Details of studies included in Mendelian randomization (MR) analyses.
Supplementary Table S2. Genetic Correlations Estimated by LDSC and HDL.
Supplementary Table S3.The results of MR analyses.
Supplementary Table S4. The results of sensitivy analysis(Cochran's Q, MR-Egger-intercept,and MR steiger tests).
Supplementary Table S5.Harmonizing data between WCadjBMI and TB .
Supplementary Table S6. Harmonizing data between WCadjBMI and TB_15_or_less .
Supplementary Table S7. Harmonizing data between WCadjBMI and TB_1530 .
Supplementary Table S8. Harmonizing data between WCadjBMI and TB_3045 .
Supplementary Table S9. Harmonizing data between WCadjBMI and TB_4560 .
Supplementary Table S10. Harmonizing data between WCadjBMI and TB_60_or_more.
Supplementary Table S11. Bidirectional associations of TB(all ages) and WCadjBMI.

## Sheet: S1
Supplementary Table S1.Details of studies included in Mendelian randomization (MR) analyses
Exposure	Abbreviation	Consortium	Sample size	PMID	Year	Ethnicity
Waist Circumference adjust BMI	WCadjBMI	GIANT consortium	142762	25673412	2015	mix
Outcome	Abbreviation	Consortium	Sample size	PMID	Year	Ethnicity
Total body bone mineral density	TB	GEFOS consortium	56284	29304378	2018	mix
Total body bone mineral density for 15 years or younger	TB_15_or_less	GEFOS consortium	11807	29304378	2018	mix
Total body bone mineral density for 15-30 years	TB_1530	GEFOS consortium	4180	29304378	2018	mix
Total body bone mineral density for 30-45 years	TB_3045	GEFOS consortium	10062	29304378	2018	mix
Total body bone mineral density for 45-60 years	TB_4560	GEFOS consortium	18805	29304378	2018	mix
Total body bone mineral density for 60 years or older	TB_60_or_more	GEFOS consortium	22504	29304378	2018	mix
* GIANT: Genetic Investigation of ANthropometric Traits; GEFOS consortium：GEnetic Factors for OSteoporosis Consortium

## Sheet: S2
Supplementary Table S2. Genetic Correlations Estimated by LDSC.
Trait1	Trait2		LDSC
		Genetic correlation	SE	P value	P.adjust	Intercept	SE	P	P.adjust
WCadjBMI	TB	-0.169	0.031	0	0	-0.009	0.005	0.082	0.164
WCadjBMI	TB_15_or_less	-0.175	0.049	0	0.002	0.002	0.004	0.582	0.694
WCadjBMI	TB_1530	-0.202	0.135	0.135	0.81	-0.009	0.005	0.058	0.164
WCadjBMI	TB_3045	-0.173	0.056	0.002	0.011	-0.005	0.005	0.27	0.455
WCadjBMI	TB_4560	-0.135	0.043	0.002	0.009	-0.004	0.005	0.412	0.55
WCadjBMI	TB_60_or_more	-0.149	0.037	0	0	-0.01	0.004	0.017	0.128

## Sheet: S3
Supplementary Table S3.The results of MR analyses.
Exposure	Outcome	Method	No.of SNP	Beta	SE	Low_CI	Up_CI	P	P.adjust
WCadjBMI	TB	IVW(MRE)	63	-0.165	0.048	-0.258	-0.071	0.001	0.005
WCadjBMI	TB	MR Egger	63	-0.29	0.197	-0.677	0.098	0.148	0.369
WCadjBMI	TB	Weighted median	63	-0.17	0.052	-0.271	-0.068	0.001	0.005
WCadjBMI	TB	Simple mode	63	-0.096	0.136	-0.363	0.172	0.485	0.607
WCadjBMI	TB	Weighted mode	63	-0.096	0.123	-0.336	0.144	0.437	0.607
WCadjBMI	TB_15_or_less	IVW(MRE)	63	-0.258	0.069	-0.394	-0.122	0	0.002
WCadjBMI	TB_15_or_less	MR Egger	63	-0.052	0.288	-0.617	0.512	0.856	0.856
WCadjBMI	TB_15_or_less	Weighted median	63	-0.339	0.101	-0.538	-0.141	0.001	0.004
WCadjBMI	TB_15_or_less	Simple mode	63	-0.467	0.244	-0.945	0.011	0.06	0.199
WCadjBMI	TB_15_or_less	Weighted mode	63	-0.437	0.245	-0.918	0.043	0.08	0.199
WCadjBMI	TB_1530	IVW(MRE)	63	0.065	0.137	-0.203	0.333	0.634	0.936
WCadjBMI	TB_1530	MR Egger	63	-0.479	0.567	-1.59	0.633	0.402	0.936
WCadjBMI	TB_1530	Weighted median	63	0.128	0.187	-0.239	0.496	0.494	0.936
WCadjBMI	TB_1530	Simple mode	63	0.038	0.48	-0.902	0.979	0.936	0.936
WCadjBMI	TB_1530	Weighted mode	63	0.088	0.462	-0.818	0.994	0.85	0.936
WCadjBMI	TB_3045	IVW(MRE)	63	-0.188	0.081	-0.346	-0.03	0.02	0.043
WCadjBMI	TB_3045	MR Egger	63	-0.472	0.332	-1.123	0.179	0.16	0.191
WCadjBMI	TB_3045	Weighted median	63	-0.345	0.118	-0.575	-0.115	0.003	0.017
WCadjBMI	TB_3045	Simple mode	63	-0.406	0.307	-1.009	0.196	0.191	0.191
WCadjBMI	TB_3045	Weighted mode	63	-0.454	0.273	-0.989	0.081	0.101	0.169
WCadjBMI	TB_4560	IVW(MRE)	63	-0.059	0.069	-0.195	0.077	0.391	0.766
WCadjBMI	TB_4560	MR Egger	63	-0.183	0.294	-0.76	0.394	0.536	0.766
WCadjBMI	TB_4560	Weighted median	63	-0.125	0.088	-0.298	0.047	0.155	0.58
WCadjBMI	TB_4560	Simple mode	63	-0.027	0.222	-0.462	0.407	0.902	0.902
WCadjBMI	TB_4560	Weighted mode	63	-0.092	0.214	-0.511	0.327	0.668	0.836
WCadjBMI	TB_60_or_more	IVW(MRE)	63	-0.224	0.066	-0.353	-0.096	0.001	0.006
WCadjBMI	TB_60_or_more	MR Egger	63	-0.424	0.269	-0.952	0.103	0.12	0.287
WCadjBMI	TB_60_or_more	Weighted median	63	-0.232	0.082	-0.393	-0.071	0.005	0.024
WCadjBMI	TB_60_or_more	Simple mode	63	-0.341	0.23	-0.792	0.11	0.144	0.287
WCadjBMI	TB_60_or_more	Weighted mode	63	-0.382	0.217	-0.808	0.045	0.084	0.28

## Sheet: S4
Supplementary Table S4. The results of sensitivy analysis(Cochran's Q, MR-Egger-intercept,and MR steiger tests).
Exposure	Outcome	F. statistics	method	Q.heterogeneity	Q_df.heterogeneity	Q_pval.heterogeneity	egger_intercept.pleiotropy	se.pleiotropy	pval.pleiotropy	correct_causal_direction.	pval.steiger tests
WCadjBMI	TB	17.83	IVW	144.11	62	1.73869e-08	0.003	0.005	0.517	TRUE	4.51393e-49
			MR Egger	143.116	61	1.49989e-08
WCadjBMI	TB_15_or_less	17.83	IVW	58.542	62	0.601	-0.005	0.007	0.463	TRUE	0
			MR Egger	57.997	61	0.585
WCadjBMI	TB_1530	18.578	IVW	73.644	62	0.148	0.014	0.014	0.327	FALSE	0.227
			MR Egger	72.484	61	0.149
WCadjBMI	TB_3045	17.83	IVW	61.357	62	0.499	0.007	0.008	0.381	TRUE	0.001
			MR Egger	60.578	61	0.491
WCadjBMI	TB_4560	17.83	IVW	85.087	62	0.028	0.003	0.007	0.667	TRUE	4.35124e-10
			MR Egger	84.826	61	0.024
WCadjBMI	TB_60_or_more	18.578	IVW	93.295	62	0.006	0.005	0.007	0.447	TRUE	1.36805e-10
			MR Egger	92.406	61	0.006

## Sheet: S5
Supplementary Table S5.Harmonizing data between WCadjBMI and TB .
Exposure	Outcome	SNP	A1	A2	BETA.exposure	BETA.outcome	EAF.exposure	EAF.outcome	SE.exposure	SE.outcome	P.exposure	P.outcome	mr_keep
WCadjBMI	TB	rs10041657	A	G	0.025	-0.02	0.217	0.223	0.004	0.007	9.1e-11	0.003443	TRUE
WCadjBMI	TB	rs10748826	C	T	-0.022	-0.004	0.422	0.445	0.004	0.006	2.5e-10	0.4656	TRUE
WCadjBMI	TB	rs10784502	C	T	0.018	-0.009	0.483	0.479	0.003	0.006	3.3e-08	0.1027	TRUE
WCadjBMI	TB	rs10923712	G	A	-0.036	-0.001	0.44	0.404	0.003	0.006	2.6e-27	0.9053	TRUE
WCadjBMI	TB	rs1108472	T	C	0.019	-0.006	0.358	0.444	0.003	0.006	1.2e-08	0.3408	TRUE
WCadjBMI	TB	rs11144688	A	G	-0.034	-0.004	0.092	0.116	0.006	0.01	4.5e-09	0.7149	TRUE
WCadjBMI	TB	rs11205277	G	A	0.026	-0.009	0.39	0.412	0.004	0.006	2.6e-13	0.1419	TRUE
WCadjBMI	TB	rs1144	C	T	0.019	-0.001	0.275	0.358	0.004	0.006	3.1e-08	0.9123	TRUE
WCadjBMI	TB	rs12207675	C	T	0.03	-0.005	0.133	0.112	0.005	0.009	3.8e-09	0.5517	TRUE
WCadjBMI	TB	rs12317176	C	T	-0.021	-0.006	0.383	0.349	0.003	0.006	3.9e-10	0.3286	TRUE
WCadjBMI	TB	rs12330322	T	C	-0.022	-0.008	0.225	0.23	0.004	0.007	1e-08	0.2528	TRUE
WCadjBMI	TB	rs12493901	A	G	-0.02	0.018	0.458	0.462	0.003	0.006	9.2e-10	0.00212	TRUE
WCadjBMI	TB	rs12608504	A	G	0.02	-0.004	0.342	0.358	0.003	0.006	2.8e-09	0.4524	TRUE
WCadjBMI	TB	rs12656497	T	C	0.022	-0.02	0.483	0.402	0.003	0.006	6.6e-11	0.0004926	TRUE
WCadjBMI	TB	rs12679556	G	T	0.025	0.001	0.208	0.287	0.004	0.006	9.7e-12	0.8489	TRUE
WCadjBMI	TB	rs12700664	T	C	-0.018	0.002	0.483	0.482	0.003	0.006	3.5e-08	0.695	TRUE
WCadjBMI	TB	rs12991495	C	T	-0.026	0.008	0.325	0.291	0.004	0.006	5.8e-13	0.1888	TRUE
WCadjBMI	TB	rs13083798	A	G	0.02	-0.008	0.542	0.498	0.003	0.006	1.5e-09	0.1571	TRUE
WCadjBMI	TB	rs1344674	G	A	0.024	-0.014	0.483	0.464	0.003	0.006	7.5e-14	0.01396	TRUE
WCadjBMI	TB	rs1482852	G	A	-0.026	0.004	0.4	0.429	0.003	0.006	3.7e-14	0.4574	TRUE
WCadjBMI	TB	rs16957304	G	A	-0.059	0	0.05	0.065	0.011	0.013	2.5e-08	0.9753	TRUE
WCadjBMI	TB	rs1776897	G	T	0.058	-0.036	0.075	0.131	0.006	0.01	1.3e-21	0.0001753	TRUE
WCadjBMI	TB	rs1884897	A	G	0.031	0.001	0.375	0.369	0.003	0.006	9.5e-20	0.8814	TRUE
WCadjBMI	TB	rs2052670	G	A	0.02	0.006	0.408	0.362	0.003	0.006	8.2e-09	0.3222	TRUE
WCadjBMI	TB	rs2079795	T	C	0.025	-0.001	0.3	0.353	0.004	0.006	2.7e-13	0.8332	TRUE
WCadjBMI	TB	rs2124969	C	T	0.02	0.002	0.408	0.395	0.003	0.006	1.2e-09	0.7313	TRUE
WCadjBMI	TB	rs2197271	G	C	0.027	-0.017	0.242	0.284	0.004	0.006	3.4e-13	0.009281	TRUE
WCadjBMI	TB	rs2214442	G	A	0.026	0.007	0.442	0.493	0.005	0.006	3.9e-09	0.1884	TRUE
WCadjBMI	TB	rs2274432	A	G	0.024	-0.01	0.373	0.342	0.004	0.006	2.4e-12	0.1057	TRUE
WCadjBMI	TB	rs2294239	G	A	-0.019	-0.001	0.45	0.411	0.003	0.006	2e-08	0.9356	TRUE
WCadjBMI	TB	rs2371767	C	G	-0.024	-0.005	0.208	0.304	0.004	0.006	2.6e-10	0.4104	TRUE
WCadjBMI	TB	rs2638953	G	C	-0.023	0.002	0.367	0.335	0.004	0.006	2.8e-11	0.7959	TRUE
WCadjBMI	TB	rs2745353	T	C	0.029	0.025	0.55	0.535	0.003	0.006	5.1e-20	9.554e-06	TRUE
WCadjBMI	TB	rs3764419	A	C	-0.02	0.002	0.375	0.395	0.003	0.006	5.5e-09	0.8026	TRUE
WCadjBMI	TB	rs3786897	G	A	0.021	-0.007	0.408	0.432	0.003	0.006	4.9e-10	0.2329	TRUE
WCadjBMI	TB	rs3791679	G	A	-0.036	0.015	0.275	0.235	0.004	0.007	3.9e-21	0.02385	TRUE
WCadjBMI	TB	rs395962	T	G	0.028	-0.019	0.367	0.313	0.004	0.006	1.2e-15	0.001695	TRUE
WCadjBMI	TB	rs4246302	G	A	0.021	0.002	0.333	0.306	0.004	0.006	3.9e-09	0.7261	TRUE
WCadjBMI	TB	rs4369779	T	C	-0.041	0.008	0.258	0.202	0.004	0.007	1.4e-24	0.2392	TRUE
WCadjBMI	TB	rs4542783	C	T	-0.022	0.006	0.388	0.46	0.004	0.006	2.2e-08	0.3152	TRUE
WCadjBMI	TB	rs4567683	A	G	0.023	-0.004	0.283	0.258	0.004	0.007	1.3e-09	0.5038	TRUE
WCadjBMI	TB	rs459193	A	G	0.023	-0.006	0.217	0.272	0.004	0.007	1.5e-10	0.3737	TRUE
WCadjBMI	TB	rs473902	G	T	-0.049	0.034	0.058	0.074	0.007	0.013	1.3e-12	0.005732	TRUE
WCadjBMI	TB	rs4886782	A	G	-0.024	0.019	0.267	0.342	0.004	0.006	4.2e-12	0.002199	TRUE
WCadjBMI	TB	rs606452	A	C	0.026	-0.001	0.158	0.167	0.005	0.008	8.8e-09	0.9355	TRUE
WCadjBMI	TB	rs6556301	T	G	0.026	-0.006	0.375	0.358	0.004	0.006	1.4e-11	0.3752	TRUE
WCadjBMI	TB	rs6751657	T	C	-0.019	-0.004	0.525	0.479	0.003	0.006	4.5e-09	0.4474	TRUE
WCadjBMI	TB	rs6900530	T	C	-0.055	0.009	0.042	0.096	0.009	0.015	1.6e-09	0.5433	TRUE
WCadjBMI	TB	rs7430034	C	T	-0.02	-0.005	0.408	0.367	0.003	0.006	4.8e-09	0.4054	TRUE
WCadjBMI	TB	rs754133	A	G	0.029	-0.017	0.333	0.353	0.004	0.006	4e-17	0.005388	TRUE
WCadjBMI	TB	rs7684221	A	G	-0.025	-0.001	0.192	0.175	0.005	0.008	2.1e-08	0.9163	TRUE
WCadjBMI	TB	rs7689420	T	C	-0.029	0.006	0.192	0.18	0.004	0.008	1.4e-11	0.4328	TRUE
WCadjBMI	TB	rs7727544	T	C	0.02	-0.008	0.592	0.522	0.003	0.006	2.3e-09	0.1475	TRUE
WCadjBMI	TB	rs7801581	T	C	0.026	-0.014	0.258	0.239	0.004	0.007	1.4e-10	0.03957	TRUE
WCadjBMI	TB	rs780159	A	G	-0.019	-0.001	0.475	0.405	0.003	0.006	1.6e-08	0.8252	TRUE
WCadjBMI	TB	rs798489	T	C	-0.024	0.017	0.275	0.247	0.004	0.007	2.9e-11	0.01215	TRUE
WCadjBMI	TB	rs806794	G	A	-0.028	0.001	0.275	0.31	0.004	0.006	5.7e-15	0.8741	TRUE
WCadjBMI	TB	rs822531	C	T	-0.024	0.002	0.267	0.199	0.004	0.007	2.6e-08	0.8402	TRUE
WCadjBMI	TB	rs849140	T	C	0.028	0.018	0.4	0.41	0.003	0.006	5.7e-17	0.001943	TRUE
WCadjBMI	TB	rs9389986	A	T	-0.024	0.001	0.25	0.325	0.004	0.006	3.3e-11	0.8397	TRUE
WCadjBMI	TB	rs9435732	T	C	-0.031	0.005	0.175	0.267	0.004	0.007	7.6e-17	0.4187	TRUE
WCadjBMI	TB	rs991967	C	A	0.026	-0.008	0.19	0.313	0.004	0.006	2.9e-13	0.2106	TRUE
WCadjBMI	TB	rs998584	C	A	-0.028	-0.009	0.525	0.529	0.004	0.006	1.1e-14	0.1318	TRUE

## Sheet: S6
Supplementary Table S6. Harmonizing data between WCadjBMI and TB_15_or_less .
Exposure	Outcome	SNP	A1	A2	BETA.exposure	BETA.outcome	EAF.exposure	EAF.outcome	SE.exposure	SE.outcome	P.exposure	P.outcome	mr_keep
WCadjBMI	TB_15_or_less	rs10041657	A	G	0.025	-0.028	0.217	0.229	0.004	0.016	9.1e-11	0.07413	TRUE
WCadjBMI	TB_15_or_less	rs10748826	C	T	-0.022	-0.006	0.422	0.434	0.004	0.013	2.5e-10	0.6737	TRUE
WCadjBMI	TB_15_or_less	rs10784502	C	T	0.018	-0.004	0.483	0.476	0.003	0.013	3.3e-08	0.7929	TRUE
WCadjBMI	TB_15_or_less	rs10923712	G	A	-0.036	-0.01	0.44	0.41	0.003	0.013	2.6e-27	0.4652	TRUE
WCadjBMI	TB_15_or_less	rs1108472	T	C	0.019	-0.018	0.358	0.443	0.003	0.013	1.2e-08	0.1682	TRUE
WCadjBMI	TB_15_or_less	rs11144688	A	G	-0.034	-0.024	0.092	0.112	0.006	0.023	4.5e-09	0.3059	TRUE
WCadjBMI	TB_15_or_less	rs11205277	G	A	0.026	-0.02	0.39	0.398	0.004	0.014	2.6e-13	0.1617	TRUE
WCadjBMI	TB_15_or_less	rs1144	C	T	0.019	-0.009	0.275	0.354	0.004	0.014	3.1e-08	0.5356	TRUE
WCadjBMI	TB_15_or_less	rs12207675	C	T	0.03	-0.014	0.133	0.116	0.005	0.021	3.8e-09	0.5027	TRUE
WCadjBMI	TB_15_or_less	rs12317176	C	T	-0.021	0.014	0.383	0.354	0.003	0.014	3.9e-10	0.3159	TRUE
WCadjBMI	TB_15_or_less	rs12330322	T	C	-0.022	-0.021	0.225	0.228	0.004	0.015	1e-08	0.1657	TRUE
WCadjBMI	TB_15_or_less	rs12493901	A	G	-0.02	0.023	0.458	0.446	0.003	0.013	9.2e-10	0.07461	TRUE
WCadjBMI	TB_15_or_less	rs12608504	A	G	0.02	-0.007	0.342	0.353	0.003	0.014	2.8e-09	0.5925	TRUE
WCadjBMI	TB_15_or_less	rs12656497	T	C	0.022	-0.023	0.483	0.405	0.003	0.013	6.6e-11	0.08263	TRUE
WCadjBMI	TB_15_or_less	rs12679556	G	T	0.025	0.008	0.208	0.29	0.004	0.014	9.7e-12	0.5706	TRUE
WCadjBMI	TB_15_or_less	rs12700664	T	C	-0.018	0.011	0.483	0.484	0.003	0.013	3.5e-08	0.3792	TRUE
WCadjBMI	TB_15_or_less	rs12991495	C	T	-0.026	0.023	0.325	0.288	0.004	0.015	5.8e-13	0.1212	TRUE
WCadjBMI	TB_15_or_less	rs13083798	A	G	0.02	-0.013	0.542	0.499	0.003	0.013	1.5e-09	0.3427	TRUE
WCadjBMI	TB_15_or_less	rs1344674	G	A	0.024	-0.008	0.483	0.466	0.003	0.013	7.5e-14	0.563	TRUE
WCadjBMI	TB_15_or_less	rs1482852	G	A	-0.026	-0.003	0.4	0.431	0.003	0.014	3.7e-14	0.811	TRUE
WCadjBMI	TB_15_or_less	rs16957304	G	A	-0.059	-0.046	0.05	0.061	0.011	0.029	2.5e-08	0.1086	TRUE
WCadjBMI	TB_15_or_less	rs1776897	G	T	0.058	-0.028	0.075	0.123	0.006	0.021	1.3e-21	0.1683	TRUE
WCadjBMI	TB_15_or_less	rs1884897	A	G	0.031	-0.021	0.375	0.375	0.003	0.014	9.5e-20	0.1311	TRUE
WCadjBMI	TB_15_or_less	rs2052670	G	A	0.02	0.015	0.408	0.363	0.003	0.014	8.2e-09	0.2852	TRUE
WCadjBMI	TB_15_or_less	rs2079795	T	C	0.025	0.014	0.3	0.356	0.004	0.014	2.7e-13	0.3013	TRUE
WCadjBMI	TB_15_or_less	rs2124969	C	T	0.02	0.005	0.408	0.382	0.003	0.013	1.2e-09	0.6965	TRUE
WCadjBMI	TB_15_or_less	rs2197271	G	C	0.027	-0.027	0.242	0.287	0.004	0.015	3.4e-13	0.06773	TRUE
WCadjBMI	TB_15_or_less	rs2214442	G	A	0.026	-0.01	0.442	0.496	0.005	0.013	3.9e-09	0.451	TRUE
WCadjBMI	TB_15_or_less	rs2274432	A	G	0.024	0.004	0.373	0.339	0.004	0.014	2.4e-12	0.7627	TRUE
WCadjBMI	TB_15_or_less	rs2294239	G	A	-0.019	-0.01	0.45	0.415	0.003	0.013	2e-08	0.468	TRUE
WCadjBMI	TB_15_or_less	rs2371767	C	G	-0.024	-0.006	0.208	0.32	0.004	0.014	2.6e-10	0.671	TRUE
WCadjBMI	TB_15_or_less	rs2638953	G	C	-0.023	-0.001	0.367	0.319	0.004	0.014	2.8e-11	0.9225	TRUE
WCadjBMI	TB_15_or_less	rs2745353	T	C	0.029	-0.001	0.55	0.528	0.003	0.013	5.1e-20	0.9442	TRUE
WCadjBMI	TB_15_or_less	rs3764419	A	C	-0.02	0.012	0.375	0.401	0.003	0.013	5.5e-09	0.3719	TRUE
WCadjBMI	TB_15_or_less	rs3786897	G	A	0.021	-0.011	0.408	0.428	0.003	0.013	4.9e-10	0.414	TRUE
WCadjBMI	TB_15_or_less	rs3791679	G	A	-0.036	0.001	0.275	0.232	0.004	0.015	3.9e-21	0.9649	TRUE
WCadjBMI	TB_15_or_less	rs395962	T	G	0.028	-0.041	0.367	0.313	0.004	0.014	1.2e-15	0.004166	TRUE
WCadjBMI	TB_15_or_less	rs4246302	G	A	0.021	0.002	0.333	0.295	0.004	0.015	3.9e-09	0.874	TRUE
WCadjBMI	TB_15_or_less	rs4369779	T	C	-0.041	0.001	0.258	0.196	0.004	0.017	1.4e-24	0.9606	TRUE
WCadjBMI	TB_15_or_less	rs4542783	C	T	-0.022	0.005	0.388	0.458	0.004	0.014	2.2e-08	0.7034	TRUE
WCadjBMI	TB_15_or_less	rs4567683	A	G	0.023	-0.015	0.283	0.257	0.004	0.015	1.3e-09	0.3135	TRUE
WCadjBMI	TB_15_or_less	rs459193	A	G	0.023	-0.008	0.217	0.275	0.004	0.015	1.5e-10	0.6057	TRUE
WCadjBMI	TB_15_or_less	rs473902	G	T	-0.049	0.017	0.058	0.076	0.007	0.031	1.3e-12	0.5882	TRUE
WCadjBMI	TB_15_or_less	rs4886782	A	G	-0.024	0.02	0.267	0.338	0.004	0.014	4.2e-12	0.1494	TRUE
WCadjBMI	TB_15_or_less	rs606452	A	C	0.026	0.007	0.158	0.163	0.005	0.018	8.8e-09	0.7119	TRUE
WCadjBMI	TB_15_or_less	rs6556301	T	G	0.026	-0.011	0.375	0.355	0.004	0.014	1.4e-11	0.4143	TRUE
WCadjBMI	TB_15_or_less	rs6751657	T	C	-0.019	-0.002	0.525	0.483	0.003	0.013	4.5e-09	0.8847	TRUE
WCadjBMI	TB_15_or_less	rs6900530	T	C	-0.055	0.03	0.042	0.069	0.009	0.029	1.6e-09	0.3121	TRUE
WCadjBMI	TB_15_or_less	rs7430034	C	T	-0.02	0.005	0.408	0.368	0.003	0.013	4.8e-09	0.7117	TRUE
WCadjBMI	TB_15_or_less	rs754133	A	G	0.029	-0.022	0.333	0.338	0.004	0.014	4e-17	0.1113	TRUE
WCadjBMI	TB_15_or_less	rs7684221	A	G	-0.025	0.019	0.192	0.176	0.005	0.018	2.1e-08	0.2897	TRUE
WCadjBMI	TB_15_or_less	rs7689420	T	C	-0.029	0.008	0.192	0.186	0.004	0.017	1.4e-11	0.6254	TRUE
WCadjBMI	TB_15_or_less	rs7727544	T	C	0.02	-0.029	0.592	0.526	0.003	0.013	2.3e-09	0.02986	TRUE
WCadjBMI	TB_15_or_less	rs7801581	T	C	0.026	-0.02	0.258	0.246	0.004	0.015	1.4e-10	0.1941	TRUE
WCadjBMI	TB_15_or_less	rs780159	A	G	-0.019	-0.019	0.475	0.401	0.003	0.013	1.6e-08	0.1567	TRUE
WCadjBMI	TB_15_or_less	rs798489	T	C	-0.024	0.015	0.275	0.243	0.004	0.015	2.9e-11	0.3178	TRUE
WCadjBMI	TB_15_or_less	rs806794	G	A	-0.028	0.007	0.275	0.3	0.004	0.015	5.7e-15	0.6517	TRUE
WCadjBMI	TB_15_or_less	rs822531	C	T	-0.024	0.014	0.267	0.197	0.004	0.016	2.6e-08	0.3848	TRUE
WCadjBMI	TB_15_or_less	rs849140	T	C	0.028	0.022	0.4	0.411	0.003	0.013	5.7e-17	0.1096	TRUE
WCadjBMI	TB_15_or_less	rs9389986	A	T	-0.024	0.004	0.25	0.339	0.004	0.014	3.3e-11	0.7844	TRUE
WCadjBMI	TB_15_or_less	rs9435732	T	C	-0.031	0.012	0.175	0.262	0.004	0.015	7.6e-17	0.4236	TRUE
WCadjBMI	TB_15_or_less	rs991967	C	A	0.026	-0.003	0.19	0.314	0.004	0.014	2.9e-13	0.8127	TRUE
WCadjBMI	TB_15_or_less	rs998584	C	A	-0.028	0.012	0.525	0.528	0.004	0.014	1.1e-14	0.4	TRUE

## Sheet: S7
Supplementary Table S7. Harmonizing data between WCadjBMI and TB_1530 .
Exposure	Outcome	SNP	A1	A2	BETA.exposure	BETA.outcome	EAF.exposure	EAF.outcome	SE.exposure	SE.outcome	P.exposure	P.outcome	mr_keep
WCadjBMI	TB_1530	rs10041657	A	G	0.025	0.029	0.217	0.224	0.004	0.027	9.1e-11	0.2927	TRUE
WCadjBMI	TB_1530	rs10748826	C	T	-0.022	0.007	0.422	0.439	0.004	0.023	2.5e-10	0.7501	TRUE
WCadjBMI	TB_1530	rs10784502	C	T	0.018	-0.003	0.483	0.487	0.003	0.022	3.3e-08	0.8813	TRUE
WCadjBMI	TB_1530	rs10923712	G	A	-0.036	0.006	0.44	0.392	0.003	0.023	2.6e-27	0.7996	TRUE
WCadjBMI	TB_1530	rs1108472	T	C	0.019	0.03	0.358	0.431	0.003	0.023	1.2e-08	0.1919	TRUE
WCadjBMI	TB_1530	rs11144688	A	G	-0.034	0.015	0.092	0.124	0.006	0.04	4.5e-09	0.7169	TRUE
WCadjBMI	TB_1530	rs11205277	G	A	0.026	0.007	0.39	0.413	0.004	0.023	2.6e-13	0.7604	TRUE
WCadjBMI	TB_1530	rs1144	C	T	0.019	0.015	0.275	0.367	0.004	0.024	3.1e-08	0.5277	TRUE
WCadjBMI	TB_1530	rs12207675	C	T	0.03	0.008	0.133	0.111	0.005	0.036	3.8e-09	0.821	TRUE
WCadjBMI	TB_1530	rs12317176	C	T	-0.021	-0.038	0.383	0.34	0.003	0.025	3.9e-10	0.1248	TRUE
WCadjBMI	TB_1530	rs12330322	T	C	-0.022	-0.039	0.225	0.228	0.004	0.027	1e-08	0.1436	TRUE
WCadjBMI	TB_1530	rs12493901	A	G	-0.02	-0.023	0.458	0.471	0.003	0.022	9.2e-10	0.3043	TRUE
WCadjBMI	TB_1530	rs12608504	A	G	0.02	0.007	0.342	0.356	0.003	0.024	2.8e-09	0.7735	TRUE
WCadjBMI	TB_1530	rs12656497	T	C	0.022	-0.038	0.483	0.408	0.003	0.023	6.6e-11	0.09962	TRUE
WCadjBMI	TB_1530	rs12679556	G	T	0.025	-0.026	0.208	0.259	0.004	0.026	9.7e-12	0.3193	TRUE
WCadjBMI	TB_1530	rs12700664	T	C	-0.018	0.002	0.483	0.499	0.003	0.022	3.5e-08	0.922	TRUE
WCadjBMI	TB_1530	rs12991495	C	T	-0.026	0.025	0.325	0.299	0.004	0.026	5.8e-13	0.3299	TRUE
WCadjBMI	TB_1530	rs13083798	A	G	0.02	-0.009	0.542	0.498	0.003	0.023	1.5e-09	0.7015	TRUE
WCadjBMI	TB_1530	rs1344674	G	A	0.024	0.023	0.483	0.455	0.003	0.023	7.5e-14	0.3038	TRUE
WCadjBMI	TB_1530	rs1482852	G	A	-0.026	-0.014	0.4	0.432	0.003	0.024	3.7e-14	0.5477	TRUE
WCadjBMI	TB_1530	rs16957304	G	A	-0.059	0.087	0.05	0.052	0.011	0.053	2.5e-08	0.1022	TRUE
WCadjBMI	TB_1530	rs1776897	G	T	0.058	0.015	0.075	0.14	0.006	0.039	1.3e-21	0.7077	TRUE
WCadjBMI	TB_1530	rs1884897	A	G	0.031	0.047	0.375	0.363	0.003	0.023	9.5e-20	0.04294	TRUE
WCadjBMI	TB_1530	rs2052670	G	A	0.02	-0.022	0.408	0.366	0.003	0.023	8.2e-09	0.3427	TRUE
WCadjBMI	TB_1530	rs2079795	T	C	0.025	0.008	0.3	0.366	0.004	0.024	2.7e-13	0.7451	TRUE
WCadjBMI	TB_1530	rs2124969	C	T	0.02	-0.025	0.408	0.398	0.003	0.023	1.2e-09	0.2884	TRUE
WCadjBMI	TB_1530	rs2197271	G	C	0.027	-0.025	0.242	0.278	0.004	0.025	3.4e-13	0.3189	TRUE
WCadjBMI	TB_1530	rs2214442	G	A	0.026	0.009	0.442	0.492	0.005	0.022	3.9e-09	0.6949	TRUE
WCadjBMI	TB_1530	rs2274432	A	G	0.024	0.018	0.373	0.339	0.004	0.024	2.4e-12	0.4456	TRUE
WCadjBMI	TB_1530	rs2294239	G	A	-0.019	-0.035	0.45	0.401	0.003	0.023	2e-08	0.1296	TRUE
WCadjBMI	TB_1530	rs2371767	C	G	-0.024	0.01	0.208	0.294	0.004	0.025	2.6e-10	0.7027	TRUE
WCadjBMI	TB_1530	rs2638953	G	C	-0.023	0.029	0.367	0.41	0.004	0.024	2.8e-11	0.2267	TRUE
WCadjBMI	TB_1530	rs2745353	T	C	0.029	0.034	0.55	0.543	0.003	0.023	5.1e-20	0.1326	TRUE
WCadjBMI	TB_1530	rs3764419	A	C	-0.02	-0.057	0.375	0.382	0.003	0.023	5.5e-09	0.01368	TRUE
WCadjBMI	TB_1530	rs3786897	G	A	0.021	-0.016	0.408	0.423	0.003	0.023	4.9e-10	0.486	TRUE
WCadjBMI	TB_1530	rs3791679	G	A	-0.036	-0.001	0.275	0.217	0.004	0.027	3.9e-21	0.9717	TRUE
WCadjBMI	TB_1530	rs395962	T	G	0.028	-0.043	0.367	0.312	0.004	0.025	1.2e-15	0.08028	TRUE
WCadjBMI	TB_1530	rs4246302	G	A	0.021	0.002	0.333	0.308	0.004	0.025	3.9e-09	0.9252	TRUE
WCadjBMI	TB_1530	rs4369779	T	C	-0.041	0.031	0.258	0.208	0.004	0.028	1.4e-24	0.2693	TRUE
WCadjBMI	TB_1530	rs4542783	C	T	-0.022	0.063	0.388	0.469	0.004	0.026	2.2e-08	0.01556	TRUE
WCadjBMI	TB_1530	rs4567683	A	G	0.023	-0.04	0.283	0.253	0.004	0.026	1.3e-09	0.1252	TRUE
WCadjBMI	TB_1530	rs459193	A	G	0.023	0.026	0.217	0.263	0.004	0.026	1.5e-10	0.3181	TRUE
WCadjBMI	TB_1530	rs473902	G	T	-0.049	0.028	0.058	0.064	0.007	0.057	1.3e-12	0.6179	TRUE
WCadjBMI	TB_1530	rs4886782	A	G	-0.024	-0.014	0.267	0.339	0.004	0.024	4.2e-12	0.5522	TRUE
WCadjBMI	TB_1530	rs606452	A	C	0.026	-0.013	0.158	0.165	0.005	0.031	8.8e-09	0.665	TRUE
WCadjBMI	TB_1530	rs6556301	T	G	0.026	0	0.375	0.345	0.004	0.028	1.4e-11	0.9979	TRUE
WCadjBMI	TB_1530	rs6751657	T	C	-0.019	0.03	0.525	0.475	0.003	0.022	4.5e-09	0.1866	TRUE
WCadjBMI	TB_1530	rs6900530	T	C	-0.055	0.013	0.042	0.065	0.009	0.06	1.6e-09	0.8287	TRUE
WCadjBMI	TB_1530	rs7162542	C	G	-0.037	0.008	0.483	0.434	0.003	0.023	1.2e-28	0.7174	FALSE
WCadjBMI	TB_1530	rs7430034	C	T	-0.02	0.006	0.408	0.367	0.003	0.024	4.8e-09	0.7952	TRUE
WCadjBMI	TB_1530	rs754133	A	G	0.029	0.018	0.333	0.36	0.004	0.023	4e-17	0.4292	TRUE
WCadjBMI	TB_1530	rs7684221	A	G	-0.025	-0.006	0.192	0.17	0.005	0.031	2.1e-08	0.8441	TRUE
WCadjBMI	TB_1530	rs7689420	T	C	-0.029	-0.046	0.192	0.181	0.004	0.029	1.4e-11	0.1141	TRUE
WCadjBMI	TB_1530	rs7727544	T	C	0.02	0.034	0.592	0.53	0.003	0.023	2.3e-09	0.1394	TRUE
WCadjBMI	TB_1530	rs7801581	T	C	0.026	-0.051	0.258	0.235	0.004	0.028	1.4e-10	0.06515	TRUE
WCadjBMI	TB_1530	rs780159	A	G	-0.019	-0.013	0.475	0.42	0.003	0.022	1.6e-08	0.5732	TRUE
WCadjBMI	TB_1530	rs798489	T	C	-0.024	0.041	0.275	0.254	0.004	0.027	2.9e-11	0.1333	TRUE
WCadjBMI	TB_1530	rs806794	G	A	-0.028	0.012	0.275	0.313	0.004	0.025	5.7e-15	0.6216	TRUE
WCadjBMI	TB_1530	rs822531	C	T	-0.024	-0.052	0.267	0.206	0.004	0.03	2.6e-08	0.08204	TRUE
WCadjBMI	TB_1530	rs849140	T	C	0.028	0.038	0.4	0.398	0.003	0.023	5.7e-17	0.1006	TRUE
WCadjBMI	TB_1530	rs9389986	A	T	-0.024	-0.004	0.25	0.316	0.004	0.025	3.3e-11	0.8753	TRUE
WCadjBMI	TB_1530	rs9435732	T	C	-0.031	0.018	0.175	0.272	0.004	0.027	7.6e-17	0.5057	TRUE
WCadjBMI	TB_1530	rs991967	C	A	0.026	0.01	0.19	0.299	0.004	0.025	2.9e-13	0.6808	TRUE
WCadjBMI	TB_1530	rs998584	C	A	-0.028	-0.026	0.525	0.53	0.004	0.028	1.1e-14	0.3518	TRUE

## Sheet: S8
Supplementary Table S8. Harmonizing data between WCadjBMI and TB_3045 .
Exposure	Outcome	SNP	A1	A2	BETA.exposure	BETA.outcome	EAF.exposure	EAF.outcome	SE.exposure	SE.outcome	P.exposure	P.outcome	mr_keep
WCadjBMI	TB_3045	rs10041657	A	G	0.025	-0.005	0.217	0.211	0.004	0.018	9.1e-11	0.7927	TRUE
WCadjBMI	TB_3045	rs10748826	C	T	-0.022	0.014	0.422	0.456	0.004	0.015	2.5e-10	0.3625	TRUE
WCadjBMI	TB_3045	rs10784502	C	T	0.018	0.002	0.483	0.464	0.003	0.014	3.3e-08	0.8739	TRUE
WCadjBMI	TB_3045	rs10923712	G	A	-0.036	-0.009	0.44	0.408	0.003	0.015	2.6e-27	0.5486	TRUE
WCadjBMI	TB_3045	rs1108472	T	C	0.019	-0.006	0.358	0.443	0.003	0.015	1.2e-08	0.666	TRUE
WCadjBMI	TB_3045	rs11144688	A	G	-0.034	0.004	0.092	0.117	0.006	0.024	4.5e-09	0.874	TRUE
WCadjBMI	TB_3045	rs11205277	G	A	0.026	0.012	0.39	0.405	0.004	0.015	2.6e-13	0.4022	TRUE
WCadjBMI	TB_3045	rs1144	C	T	0.019	-0.008	0.275	0.361	0.004	0.016	3.1e-08	0.5932	TRUE
WCadjBMI	TB_3045	rs12207675	C	T	0.03	-0.011	0.133	0.11	0.005	0.023	3.8e-09	0.6557	TRUE
WCadjBMI	TB_3045	rs12317176	C	T	-0.021	0.008	0.383	0.348	0.003	0.016	3.9e-10	0.6201	TRUE
WCadjBMI	TB_3045	rs12330322	T	C	-0.022	0.013	0.225	0.234	0.004	0.018	1e-08	0.4545	TRUE
WCadjBMI	TB_3045	rs12493901	A	G	-0.02	0.01	0.458	0.464	0.003	0.015	9.2e-10	0.512	TRUE
WCadjBMI	TB_3045	rs12608504	A	G	0.02	-0.027	0.342	0.36	0.003	0.015	2.8e-09	0.07201	TRUE
WCadjBMI	TB_3045	rs12656497	T	C	0.022	-0.008	0.483	0.396	0.003	0.015	6.6e-11	0.617	TRUE
WCadjBMI	TB_3045	rs12679556	G	T	0.025	-0.01	0.208	0.301	0.004	0.017	9.7e-12	0.5632	TRUE
WCadjBMI	TB_3045	rs12700664	T	C	-0.018	0	0.483	0.474	0.003	0.015	3.5e-08	0.9855	TRUE
WCadjBMI	TB_3045	rs12991495	C	T	-0.026	0.009	0.325	0.281	0.004	0.016	5.8e-13	0.5818	TRUE
WCadjBMI	TB_3045	rs13083798	A	G	0.02	-0.014	0.542	0.5	0.003	0.015	1.5e-09	0.3516	TRUE
WCadjBMI	TB_3045	rs1344674	G	A	0.024	-0.016	0.483	0.457	0.003	0.015	7.5e-14	0.2823	TRUE
WCadjBMI	TB_3045	rs1482852	G	A	-0.026	0.014	0.4	0.431	0.003	0.016	3.7e-14	0.3732	TRUE
WCadjBMI	TB_3045	rs16957304	G	A	-0.059	0.021	0.05	0.06	0.011	0.034	2.5e-08	0.5355	TRUE
WCadjBMI	TB_3045	rs1776897	G	T	0.058	-0.038	0.075	0.141	0.006	0.024	1.3e-21	0.1162	TRUE
WCadjBMI	TB_3045	rs1884897	A	G	0.031	-0.009	0.375	0.351	0.003	0.016	9.5e-20	0.5693	TRUE
WCadjBMI	TB_3045	rs2052670	G	A	0.02	0.006	0.408	0.37	0.003	0.015	8.2e-09	0.6841	TRUE
WCadjBMI	TB_3045	rs2079795	T	C	0.025	0.018	0.3	0.359	0.004	0.016	2.7e-13	0.2389	TRUE
WCadjBMI	TB_3045	rs2124969	C	T	0.02	-0.02	0.408	0.38	0.003	0.015	1.2e-09	0.1825	TRUE
WCadjBMI	TB_3045	rs2197271	G	C	0.027	-0.002	0.242	0.285	0.004	0.017	3.4e-13	0.8859	TRUE
WCadjBMI	TB_3045	rs2214442	G	A	0.026	0.021	0.442	0.504	0.005	0.015	3.9e-09	0.1483	TRUE
WCadjBMI	TB_3045	rs2274432	A	G	0.024	-0.011	0.373	0.339	0.004	0.015	2.4e-12	0.4802	TRUE
WCadjBMI	TB_3045	rs2294239	G	A	-0.019	0	0.45	0.411	0.003	0.015	2e-08	0.9866	TRUE
WCadjBMI	TB_3045	rs2371767	C	G	-0.024	-0.003	0.208	0.301	0.004	0.016	2.6e-10	0.8792	TRUE
WCadjBMI	TB_3045	rs2638953	G	C	-0.023	-0.022	0.367	0.385	0.004	0.016	2.8e-11	0.1655	TRUE
WCadjBMI	TB_3045	rs2745353	T	C	0.029	0.025	0.55	0.54	0.003	0.015	5.1e-20	0.09254	TRUE
WCadjBMI	TB_3045	rs3764419	A	C	-0.02	-0.003	0.375	0.396	0.003	0.015	5.5e-09	0.8294	TRUE
WCadjBMI	TB_3045	rs3786897	G	A	0.021	0.027	0.408	0.426	0.003	0.015	4.9e-10	0.07211	TRUE
WCadjBMI	TB_3045	rs3791679	G	A	-0.036	0.017	0.275	0.238	0.004	0.018	3.9e-21	0.3395	TRUE
WCadjBMI	TB_3045	rs395962	T	G	0.028	-0.022	0.367	0.307	0.004	0.016	1.2e-15	0.1849	TRUE
WCadjBMI	TB_3045	rs4246302	G	A	0.021	-0.021	0.333	0.295	0.004	0.016	3.9e-09	0.1883	TRUE
WCadjBMI	TB_3045	rs4369779	T	C	-0.041	0.025	0.258	0.211	0.004	0.018	1.4e-24	0.1805	TRUE
WCadjBMI	TB_3045	rs4542783	C	T	-0.022	0.023	0.388	0.467	0.004	0.017	2.2e-08	0.1723	TRUE
WCadjBMI	TB_3045	rs4567683	A	G	0.023	0.016	0.283	0.255	0.004	0.017	1.3e-09	0.3425	TRUE
WCadjBMI	TB_3045	rs459193	A	G	0.023	-0.03	0.217	0.278	0.004	0.016	1.5e-10	0.07077	TRUE
WCadjBMI	TB_3045	rs473902	G	T	-0.049	0.075	0.058	0.07	0.007	0.032	1.3e-12	0.01914	TRUE
WCadjBMI	TB_3045	rs4886782	A	G	-0.024	0.016	0.267	0.332	0.004	0.016	4.2e-12	0.318	TRUE
WCadjBMI	TB_3045	rs606452	A	C	0.026	0.024	0.158	0.173	0.005	0.021	8.8e-09	0.2596	TRUE
WCadjBMI	TB_3045	rs6556301	T	G	0.026	-0.01	0.375	0.355	0.004	0.017	1.4e-11	0.551	TRUE
WCadjBMI	TB_3045	rs6751657	T	C	-0.019	0.002	0.525	0.481	0.003	0.015	4.5e-09	0.9072	TRUE
WCadjBMI	TB_3045	rs6900530	T	C	-0.055	0.011	0.042	0.063	0.009	0.038	1.6e-09	0.7707	TRUE
WCadjBMI	TB_3045	rs7430034	C	T	-0.02	-0.002	0.408	0.361	0.003	0.016	4.8e-09	0.9175	TRUE
WCadjBMI	TB_3045	rs754133	A	G	0.029	-0.016	0.333	0.352	0.004	0.015	4e-17	0.2872	TRUE
WCadjBMI	TB_3045	rs7684221	A	G	-0.025	0.022	0.192	0.178	0.005	0.02	2.1e-08	0.29	TRUE
WCadjBMI	TB_3045	rs7689420	T	C	-0.029	0.01	0.192	0.187	0.004	0.019	1.4e-11	0.5949	TRUE
WCadjBMI	TB_3045	rs7727544	T	C	0.02	0.009	0.592	0.509	0.003	0.015	2.3e-09	0.5715	TRUE
WCadjBMI	TB_3045	rs7801581	T	C	0.026	-0.031	0.258	0.232	0.004	0.018	1.4e-10	0.07857	TRUE
WCadjBMI	TB_3045	rs780159	A	G	-0.019	0.001	0.475	0.397	0.003	0.015	1.6e-08	0.9347	TRUE
WCadjBMI	TB_3045	rs798489	T	C	-0.024	0.027	0.275	0.246	0.004	0.017	2.9e-11	0.1169	TRUE
WCadjBMI	TB_3045	rs806794	G	A	-0.028	0.026	0.275	0.332	0.004	0.016	5.7e-15	0.1009	TRUE
WCadjBMI	TB_3045	rs822531	C	T	-0.024	-0.026	0.267	0.203	0.004	0.019	2.6e-08	0.1738	TRUE
WCadjBMI	TB_3045	rs849140	T	C	0.028	0.028	0.4	0.405	0.003	0.015	5.7e-17	0.06276	TRUE
WCadjBMI	TB_3045	rs9389986	A	T	-0.024	-0.013	0.25	0.343	0.004	0.016	3.3e-11	0.4093	TRUE
WCadjBMI	TB_3045	rs9435732	T	C	-0.031	-0.009	0.175	0.282	0.004	0.017	7.6e-17	0.5953	TRUE
WCadjBMI	TB_3045	rs991967	C	A	0.026	-0.01	0.19	0.33	0.004	0.016	2.9e-13	0.5355	TRUE
WCadjBMI	TB_3045	rs998584	C	A	-0.028	-0.012	0.525	0.528	0.004	0.016	1.1e-14	0.4609	TRUE

## Sheet: S9
Supplementary Table S9. Harmonizing data between WCadjBMI and TB_4560 .
Exposure	Outcome	SNP	A1	A2	BETA.exposure	BETA.outcome	EAF.exposure	EAF.outcome	SE.exposure	SE.outcome	P.exposure	P.outcome	mr_keep
WCadjBMI	TB_4560	rs10041657	A	G	0.025	-0.022	0.217	0.218	0.004	0.013	9.1e-11	0.09217	TRUE
WCadjBMI	TB_4560	rs10748826	C	T	-0.022	-0.002	0.422	0.45	0.004	0.011	2.5e-10	0.8914	TRUE
WCadjBMI	TB_4560	rs10784502	C	T	0.018	-0.026	0.483	0.477	0.003	0.011	3.3e-08	0.01373	TRUE
WCadjBMI	TB_4560	rs10923712	G	A	-0.036	0.005	0.44	0.395	0.003	0.011	2.6e-27	0.6838	TRUE
WCadjBMI	TB_4560	rs1108472	T	C	0.019	0.003	0.358	0.443	0.003	0.011	1.2e-08	0.7951	TRUE
WCadjBMI	TB_4560	rs11144688	A	G	-0.034	0.014	0.092	0.117	0.006	0.018	4.5e-09	0.429	TRUE
WCadjBMI	TB_4560	rs11205277	G	A	0.026	-0.008	0.39	0.421	0.004	0.011	2.6e-13	0.4523	TRUE
WCadjBMI	TB_4560	rs1144	C	T	0.019	0.012	0.275	0.363	0.004	0.011	3.1e-08	0.281	TRUE
WCadjBMI	TB_4560	rs12207675	C	T	0.03	0.004	0.133	0.113	0.005	0.017	3.8e-09	0.8112	TRUE
WCadjBMI	TB_4560	rs12317176	C	T	-0.021	-0.006	0.383	0.338	0.003	0.012	3.9e-10	0.6046	TRUE
WCadjBMI	TB_4560	rs12330322	T	C	-0.022	-0.005	0.225	0.226	0.004	0.013	1e-08	0.6757	TRUE
WCadjBMI	TB_4560	rs12493901	A	G	-0.02	0.019	0.458	0.467	0.003	0.011	9.2e-10	0.07769	TRUE
WCadjBMI	TB_4560	rs12608504	A	G	0.02	0.006	0.342	0.358	0.003	0.011	2.8e-09	0.5635	TRUE
WCadjBMI	TB_4560	rs12656497	T	C	0.022	-0.018	0.483	0.399	0.003	0.011	6.6e-11	0.09373	TRUE
WCadjBMI	TB_4560	rs12679556	G	T	0.025	-0.003	0.208	0.275	0.004	0.012	9.7e-12	0.7951	TRUE
WCadjBMI	TB_4560	rs12700664	T	C	-0.018	0.011	0.483	0.487	0.003	0.011	3.5e-08	0.309	TRUE
WCadjBMI	TB_4560	rs12991495	C	T	-0.026	0.005	0.325	0.293	0.004	0.012	5.8e-13	0.6998	TRUE
WCadjBMI	TB_4560	rs13083798	A	G	0.02	-0.016	0.542	0.5	0.003	0.011	1.5e-09	0.146	TRUE
WCadjBMI	TB_4560	rs1344674	G	A	0.024	0.001	0.483	0.461	0.003	0.011	7.5e-14	0.9219	TRUE
WCadjBMI	TB_4560	rs1482852	G	A	-0.026	-0.001	0.4	0.424	0.003	0.012	3.7e-14	0.9402	TRUE
WCadjBMI	TB_4560	rs16957304	G	A	-0.059	0.01	0.05	0.049	0.011	0.026	2.5e-08	0.6965	TRUE
WCadjBMI	TB_4560	rs1776897	G	T	0.058	-0.031	0.075	0.102	0.006	0.02	1.3e-21	0.1147	TRUE
WCadjBMI	TB_4560	rs1884897	A	G	0.031	0.008	0.375	0.361	0.003	0.011	9.5e-20	0.4616	TRUE
WCadjBMI	TB_4560	rs2052670	G	A	0.02	-0.006	0.408	0.351	0.003	0.011	8.2e-09	0.5767	TRUE
WCadjBMI	TB_4560	rs2079795	T	C	0.025	-0.013	0.3	0.344	0.004	0.011	2.7e-13	0.2562	TRUE
WCadjBMI	TB_4560	rs2124969	C	T	0.02	0.01	0.408	0.405	0.003	0.011	1.2e-09	0.3624	TRUE
WCadjBMI	TB_4560	rs2197271	G	C	0.027	-0.018	0.242	0.269	0.004	0.012	3.4e-13	0.145	TRUE
WCadjBMI	TB_4560	rs2214442	G	A	0.026	0.014	0.442	0.492	0.005	0.011	3.9e-09	0.1931	TRUE
WCadjBMI	TB_4560	rs2274432	A	G	0.024	-0.014	0.373	0.351	0.004	0.011	2.4e-12	0.2172	TRUE
WCadjBMI	TB_4560	rs2294239	G	A	-0.019	-0.001	0.45	0.412	0.003	0.011	2e-08	0.9126	TRUE
WCadjBMI	TB_4560	rs2371767	C	G	-0.024	0.003	0.208	0.283	0.004	0.012	2.6e-10	0.7721	TRUE
WCadjBMI	TB_4560	rs2638953	G	C	-0.023	0.005	0.367	0.316	0.004	0.012	2.8e-11	0.6946	TRUE
WCadjBMI	TB_4560	rs2745353	T	C	0.029	0.04	0.55	0.537	0.003	0.011	5.1e-20	0.0002043	TRUE
WCadjBMI	TB_4560	rs3764419	A	C	-0.02	0.009	0.375	0.386	0.003	0.011	5.5e-09	0.4047	TRUE
WCadjBMI	TB_4560	rs3786897	G	A	0.021	0.001	0.408	0.432	0.003	0.011	4.9e-10	0.9565	TRUE
WCadjBMI	TB_4560	rs3791679	G	A	-0.036	0.026	0.275	0.24	0.004	0.013	3.9e-21	0.0456	TRUE
WCadjBMI	TB_4560	rs395962	T	G	0.028	0.001	0.367	0.318	0.004	0.012	1.2e-15	0.931	TRUE
WCadjBMI	TB_4560	rs4246302	G	A	0.021	0.019	0.333	0.31	0.004	0.012	3.9e-09	0.1087	TRUE
WCadjBMI	TB_4560	rs4369779	T	C	-0.041	0.01	0.258	0.203	0.004	0.013	1.4e-24	0.4581	TRUE
WCadjBMI	TB_4560	rs4542783	C	T	-0.022	-0.008	0.388	0.449	0.004	0.012	2.2e-08	0.5014	TRUE
WCadjBMI	TB_4560	rs4567683	A	G	0.023	-0.006	0.283	0.26	0.004	0.012	1.3e-09	0.6081	TRUE
WCadjBMI	TB_4560	rs459193	A	G	0.023	0.008	0.217	0.269	0.004	0.012	1.5e-10	0.5235	TRUE
WCadjBMI	TB_4560	rs473902	G	T	-0.049	0.029	0.058	0.074	0.007	0.023	1.3e-12	0.2112	TRUE
WCadjBMI	TB_4560	rs4886782	A	G	-0.024	0.029	0.267	0.347	0.004	0.011	4.2e-12	0.01163	TRUE
WCadjBMI	TB_4560	rs606452	A	C	0.026	0.008	0.158	0.161	0.005	0.016	8.8e-09	0.6168	TRUE
WCadjBMI	TB_4560	rs6556301	T	G	0.026	0.012	0.375	0.367	0.004	0.012	1.4e-11	0.3277	TRUE
WCadjBMI	TB_4560	rs6751657	T	C	-0.019	-0.003	0.525	0.475	0.003	0.011	4.5e-09	0.7521	TRUE
WCadjBMI	TB_4560	rs6900530	T	C	-0.055	0.031	0.042	0.041	0.009	0.032	1.6e-09	0.33	TRUE
WCadjBMI	TB_4560	rs7430034	C	T	-0.02	-0.02	0.408	0.363	0.003	0.011	4.8e-09	0.07815	TRUE
WCadjBMI	TB_4560	rs754133	A	G	0.029	0.006	0.333	0.361	0.004	0.011	4e-17	0.6139	TRUE
WCadjBMI	TB_4560	rs7684221	A	G	-0.025	-0.024	0.192	0.158	0.005	0.015	2.1e-08	0.1167	TRUE
WCadjBMI	TB_4560	rs7689420	T	C	-0.029	0.011	0.192	0.175	0.004	0.014	1.4e-11	0.4568	TRUE
WCadjBMI	TB_4560	rs7727544	T	C	0.02	-0.012	0.592	0.526	0.003	0.011	2.3e-09	0.2665	TRUE
WCadjBMI	TB_4560	rs7801581	T	C	0.026	-0.014	0.258	0.239	0.004	0.013	1.4e-10	0.2643	TRUE
WCadjBMI	TB_4560	rs780159	A	G	-0.019	0.011	0.475	0.407	0.003	0.011	1.6e-08	0.3	TRUE
WCadjBMI	TB_4560	rs798489	T	C	-0.024	0.007	0.275	0.25	0.004	0.012	2.9e-11	0.5951	TRUE
WCadjBMI	TB_4560	rs806794	G	A	-0.028	-0.024	0.275	0.305	0.004	0.012	5.7e-15	0.04466	TRUE
WCadjBMI	TB_4560	rs822531	C	T	-0.024	0.003	0.267	0.197	0.004	0.014	2.6e-08	0.8361	TRUE
WCadjBMI	TB_4560	rs849140	T	C	0.028	0.018	0.4	0.414	0.003	0.011	5.7e-17	0.101	TRUE
WCadjBMI	TB_4560	rs9389986	A	T	-0.024	-0.004	0.25	0.308	0.004	0.012	3.3e-11	0.7396	TRUE
WCadjBMI	TB_4560	rs9435732	T	C	-0.031	-0.001	0.175	0.269	0.004	0.012	7.6e-17	0.9349	TRUE
WCadjBMI	TB_4560	rs991967	C	A	0.026	-0.004	0.19	0.311	0.004	0.012	2.9e-13	0.7229	TRUE
WCadjBMI	TB_4560	rs998584	C	A	-0.028	-0.02	0.525	0.522	0.004	0.011	1.1e-14	0.07413	TRUE

[truncated: 2 more sheets: S10, S11]
